# Supplementary material
Source: HighWire-hosted journal article supplement (https://jitc.bmj.com/content/9/10/e002947)

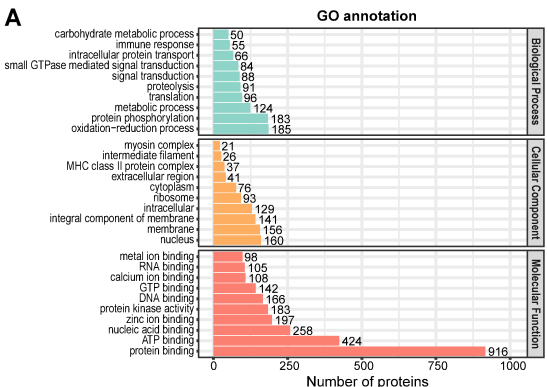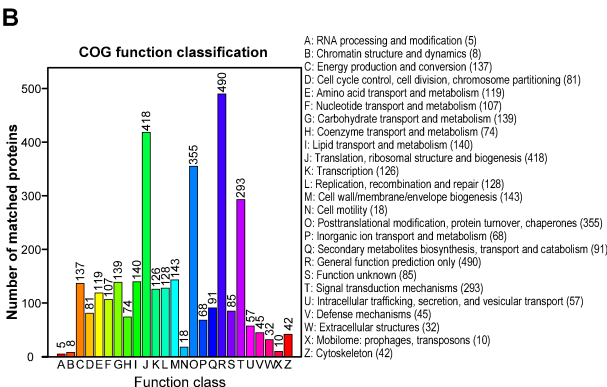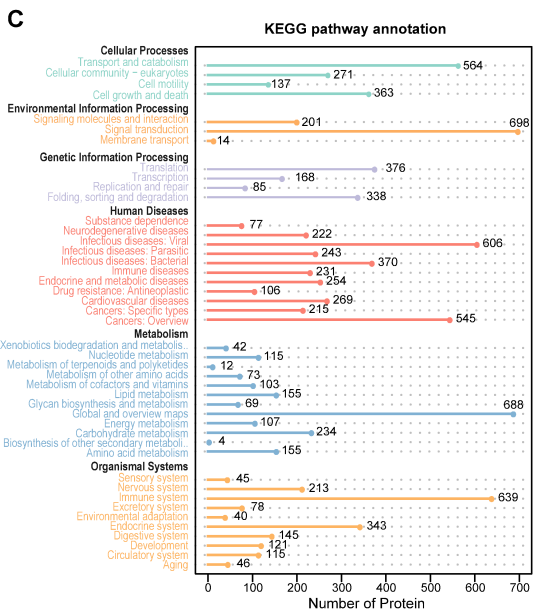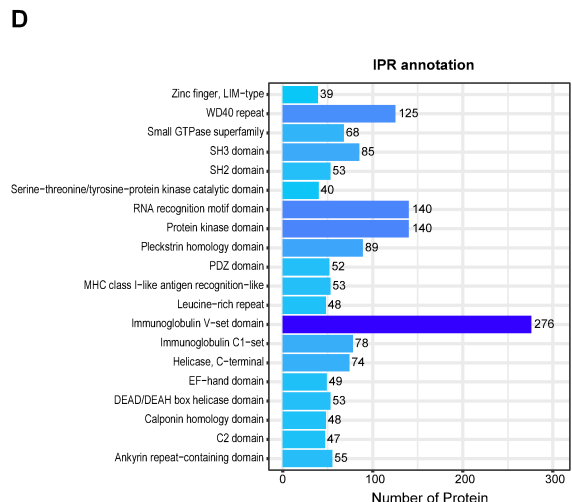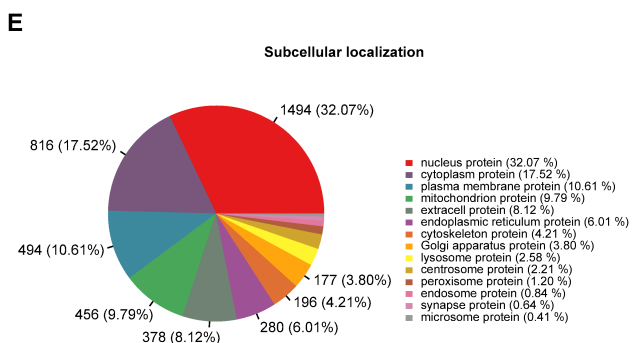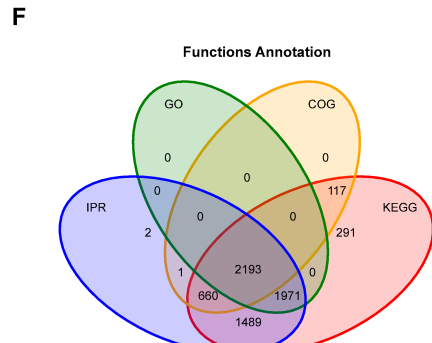

Supplement: inline-supplementary-material-5 [file inline-supplementary-material-5.pdf]
